# Supplementary material for: SNPs, short tandem repeats, and structural variants are responsible for differential gene expression across C57BL/6 and C57BL/10 substrains
Source: PubMed Central journal article supplement (PMC9205302; doi:10.1016/j.xgen.2022.100102), 2022-03-09
Supplement: NIHMS1787765-supplement-1.pdf [file NIHMS1787765-supplement-1.pdf]

**Cell Genomics, Volume 2**

**Supplemental information**

**SNPs, short tandem repeats, and structural variants  
are responsible for differential gene expression  
across C57BL/6 and C57BL/10 substrains**

**Milad Mortazavi, Yangsu Ren, Shubham Saini, Danny Antaki, Celine L. St. Pierre, April Williams, Abhishek Sohni, Miles F. Wilkinson, Melissa Gymrek, Jonathan Sebat, and Abraham A. Palmer**

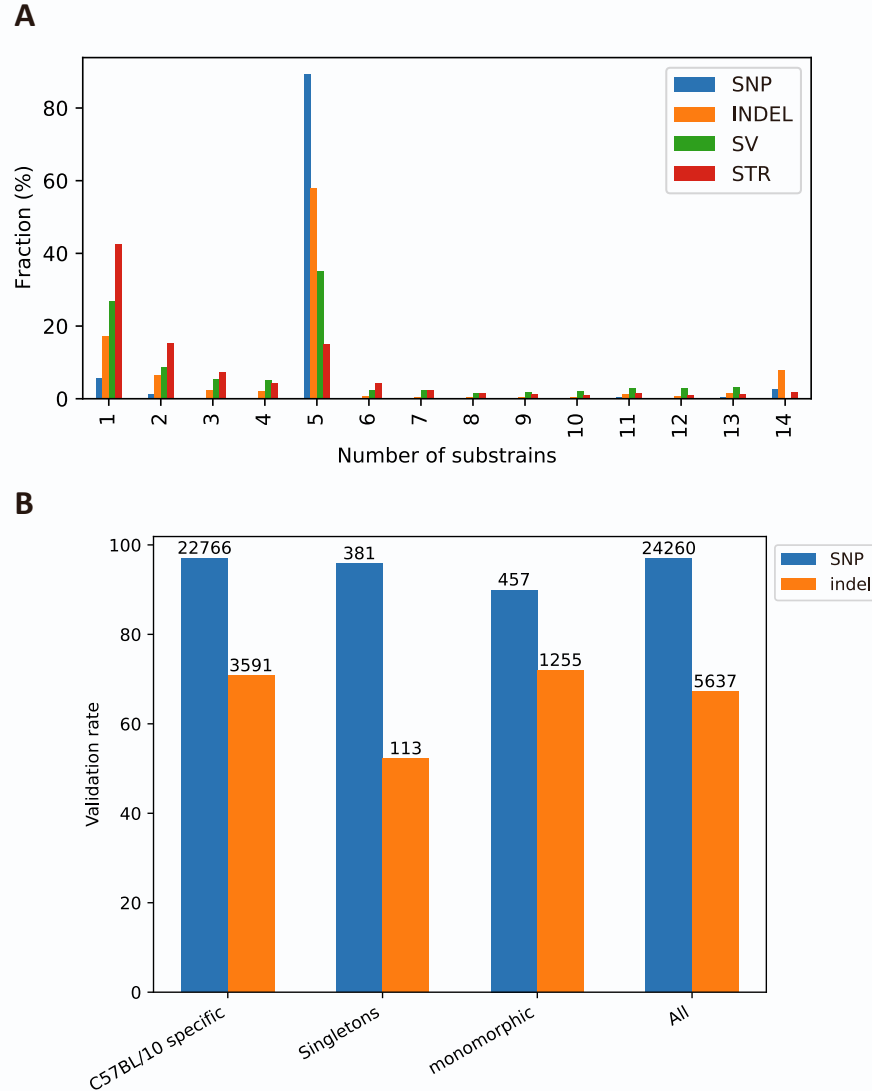

**Figure S1. Variant frequency and validation rates, related to STAR Methods. A:** Fraction of variants observed in substrains (five C57BL/10 and nine C57BL/6 substrains) in each variant category. The spike at 5 reflects polymorphisms that separated C57BL/10 (n=5) from C57BL/6 (n=9) substrains. The smaller spike at 14 represents instances where none of the substrains (including C57BL/6J, which is the basis for mm10) matched the mm10 reference genome. **B:** Validation rates of WGS variants in the protein coding regions using RNA-Seq data. WGS SNPs and INDELS which intersect with protein coding exon and UTR annotations (from Ensembl) and have at least 3X coverage in RNA-Seq dataset are considered for validation. Variants from RNA-Seq data were called by GATK best practices[S1] for each substrain separately (see also STAR Methods). Validation rate between different categories of variants are compared. The total number of variants in each category is indicated on top of each bar. Overall 97% of all SNPs and 67% of all INDELS were validated using RNA-Seq data.



segments with C57BL/10-specific SNP hotspots. X-axis shows strains that have at least 300 common loci and at least 90% concordance with C57BL/10-specific SNPs in each segment. The SNP data for the strains is obtained from MGI[S2]. The segments are color coded with the concordance value. The strain labels on the x-axis are color coded with blue: *domesticus* origin, and red: *musculus* origin[S3].

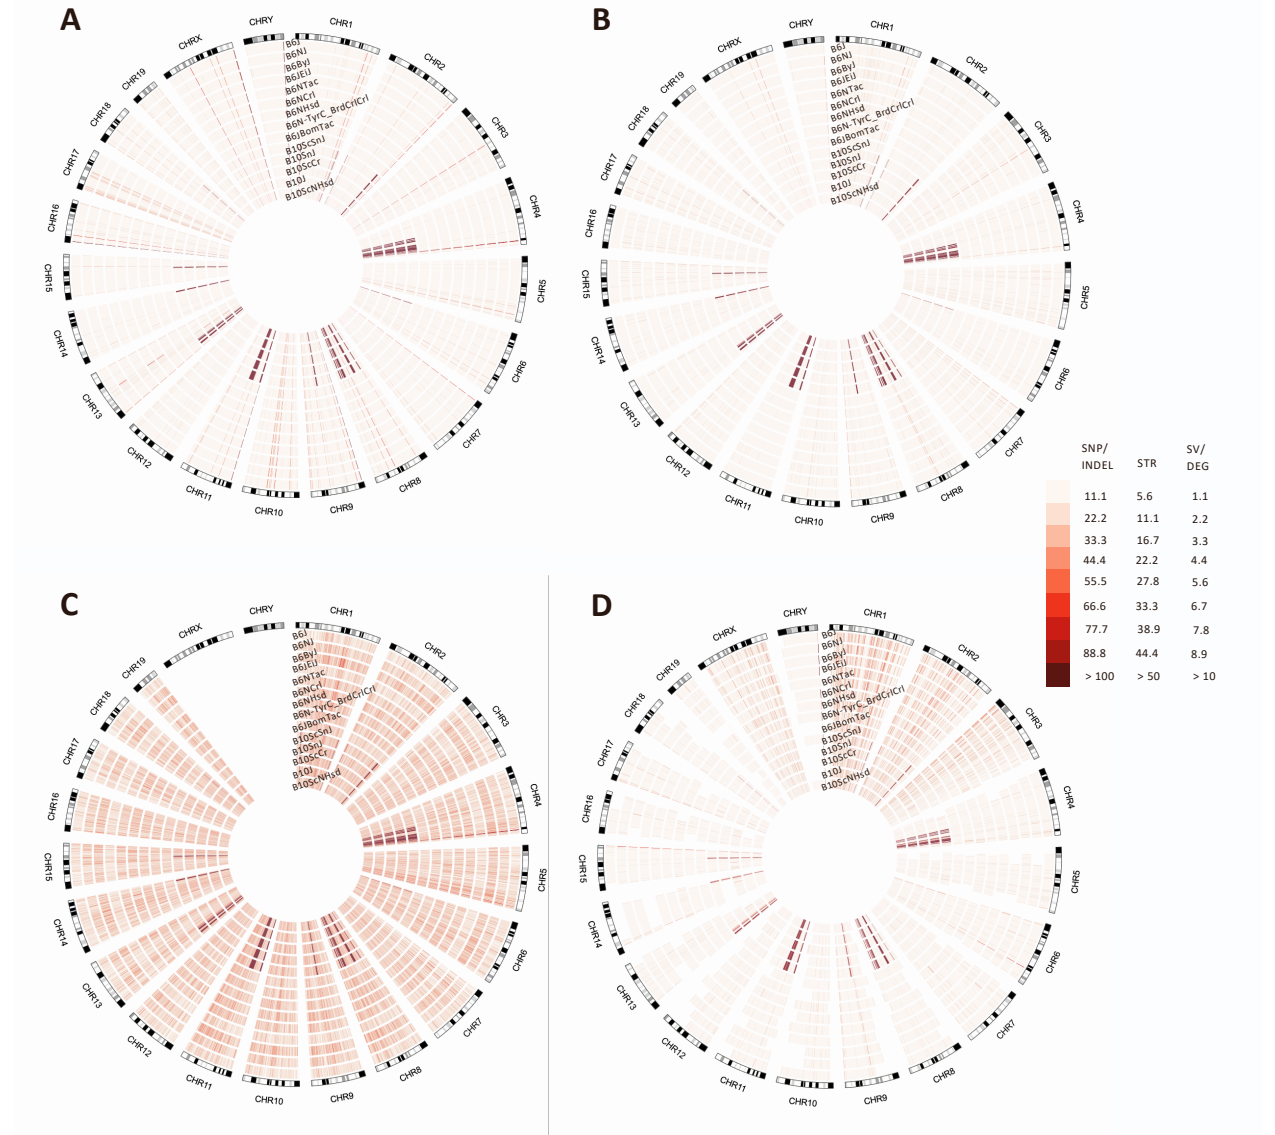

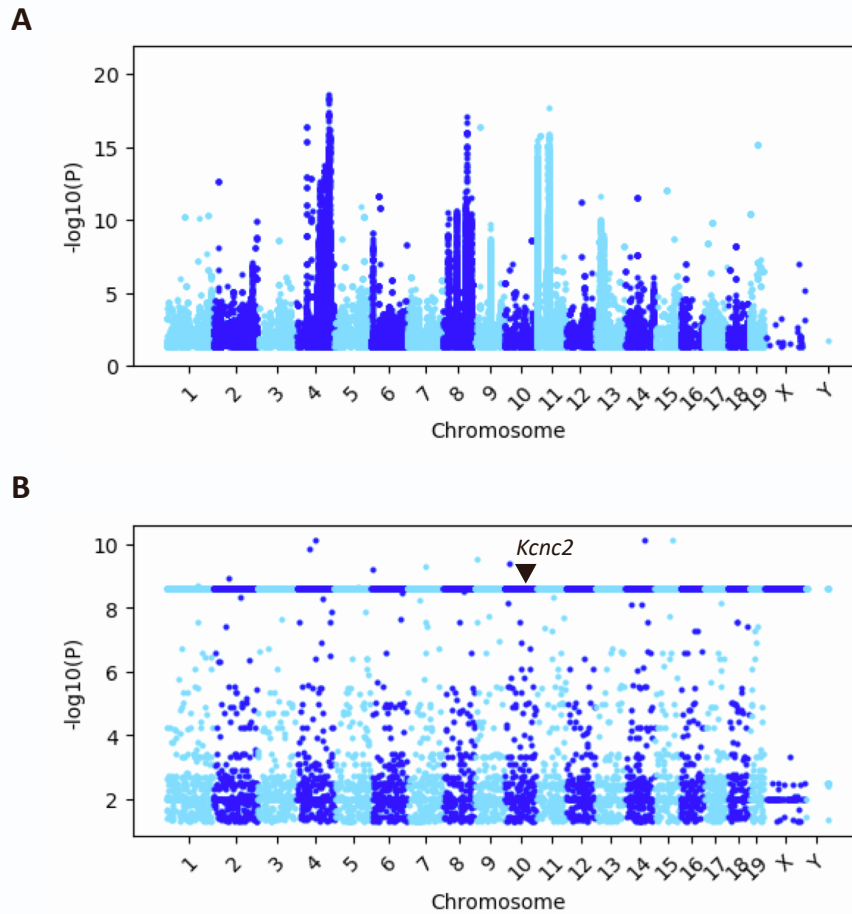

**Figure S4. Association of all genomic variants and expression of DEGenes, related to Figure 2.** Association tests of DEGene expressions of C57BL/6 and C57BL/10 substrains with all genomic variants (SNPs, INDELs, STRs and SVs) was performed by linear regression model with Limix[S4] **A:** Association of DEGene expressions with all variants (SNPs, INDELs, STRs and SVs) in the *cis*-region defined as 1Mb upstream and 1Mb downstream of the DEGene. The p-values are plotted at the genomic locations of the corresponding DEGenes. **B:** Association of *Kcnc2* expression with all genomic variants across the genome shows that variants with the same strain distribution pattern have identical p-values. The flat horizontal line at about  $-\log_{10}(p) = 8.4$  reflects features that have the same strain distribution pattern and therefore all yield identical p-values when tested for association with the gene expression data.

| Strain   | Substrain         | CNVnator |      | Lumpy |     |     |
|----------|-------------------|----------|------|-------|-----|-----|
|          |                   | DEL      | DUP  | DEL   | DUP | INV |
| C57BL/6  | C57BL/6J          | 27       | 461  | 11    | 97  | 2   |
|          | C57BL/6NJ         | 5        | 456  | 65    | 105 | 2   |
|          | C57BL/6ByJ        | 11       | 426  | 82    | 90  | 5   |
|          | C57BL/6JeiJ       | 14       | 469  | 42    | 91  | 4   |
|          | C57BL/6Ntac       | 27       | 465  | 64    | 77  | 4   |
|          | C57BL/6NCrI       | 9        | 420  | 66    | 92  | 2   |
|          | C57BL/6NHsd       | 127      | 488  | 73    | 86  | 3   |
|          | B6N-TyrC/BrdCrCrI | 7        | 445  | 63    | 96  | 3   |
|          | C57BL/6JbomTac    | 13       | 447  | 50    | 78  | 3   |
| C57BL/10 | C57BL/10ScSnJ     | 95       | 430  | 1204  | 129 | 15  |
|          | C57BL/10SnJ       | 89       | 420  | 1195  | 125 | 13  |
|          | C57BL/10ScCr      | 269      | 481  | 1196  | 103 | 15  |
|          | C57BL/10J         | 74       | 437  | 1193  | 115 | 16  |
|          | C57BL/10ScNHsd    | 72       | 426  | 1192  | 123 | 14  |
|          | TOTAL             | 448      | 1308 | 1369  | 279 | 21  |

**Table S1. Number of SVs found in C57BL substrains, related to Methods details.**







## References:

[S1] Van der Auwera, G.A., and O'Connor, B.D. (2020). *Genomics in the Cloud* (O'Reilly Media, Inc.).

[S2] MGI Search Mouse SNPs. <http://www.informatics.jax.org/snp>.

[S3] Yang, H., Wang, J.R., Didion, J.P., Buus, R.J., Bell, T.A., Welsh, C.E., Bonhomme, F., Yu, A.H., Nachman, M.W., Pialek, J., et al. (2011). Subspecific origin and haplotype diversity in the laboratory mouse. *Nature genetics* 43, 648-655.

[S4] Lippert, C., Casale, F.P., Rakitsch, B., and Stegle, O. (2014). LIMIX: genetic analysis of multiple traits. *bioRxiv*, 10.1101/003905.
